# Supplementary figures and images for: The Effects of Physiological and Methodological Determinants on 18F-FDG Mouse Brain Imaging Exemplified in a Double Transgenic Alzheimer Model
Source: PubMed Central journal article supplement — Mol Imaging. 2016 Feb 11;15:1536012115624919. doi: 10.1177/1536012115624919 (PMC5470082; doi:10.1177/1536012115624919), 2016-02-11

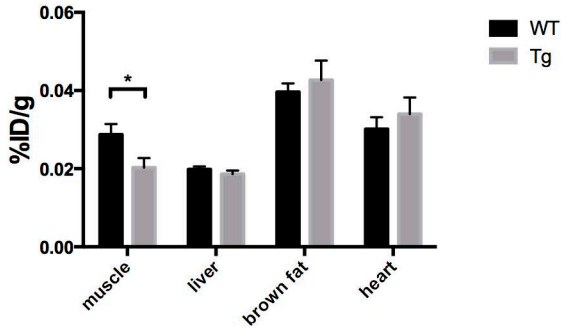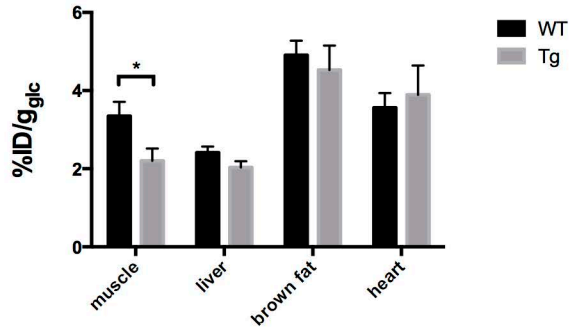

Supplement: Supplementaryfigure_919.pdf [file Supplementaryfigure_919.pdf]
